# Supplementary material
Source: PubMed Central journal article supplement (PMC1564256)

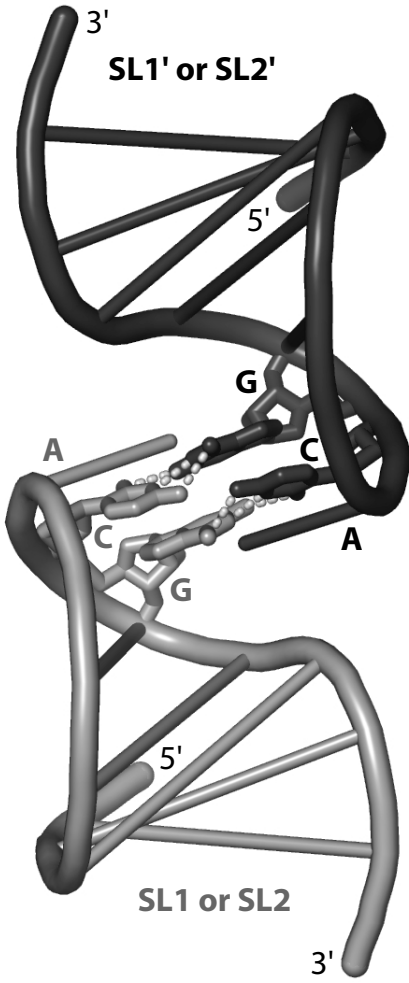

Supplement: pnas_0606156103_1.pdf [file pnas_0606156103_1.pdf]

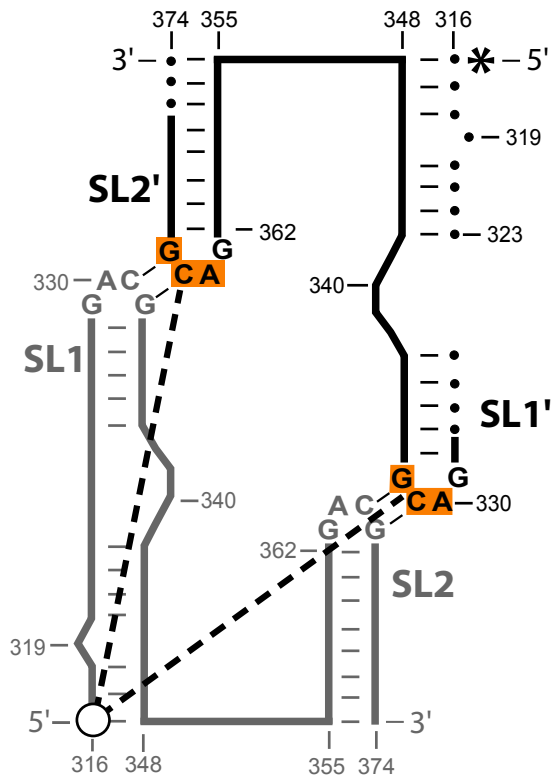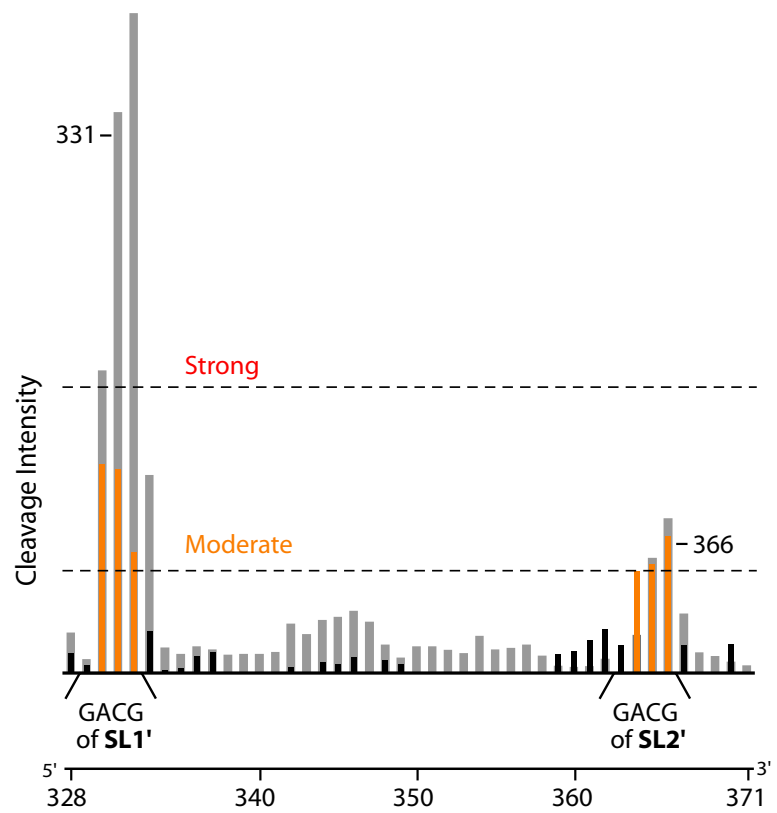

Supplement: pnas_0606156103_2.pdf [file pnas_0606156103_2.pdf]

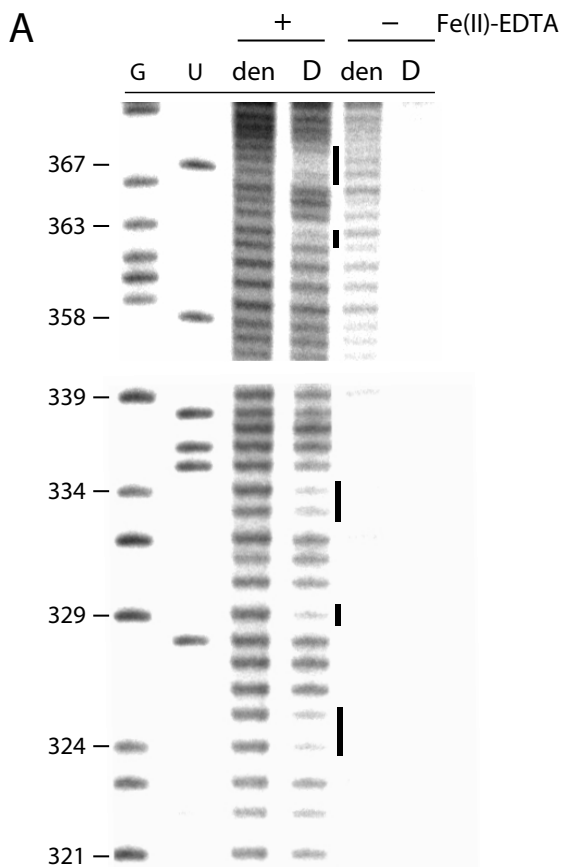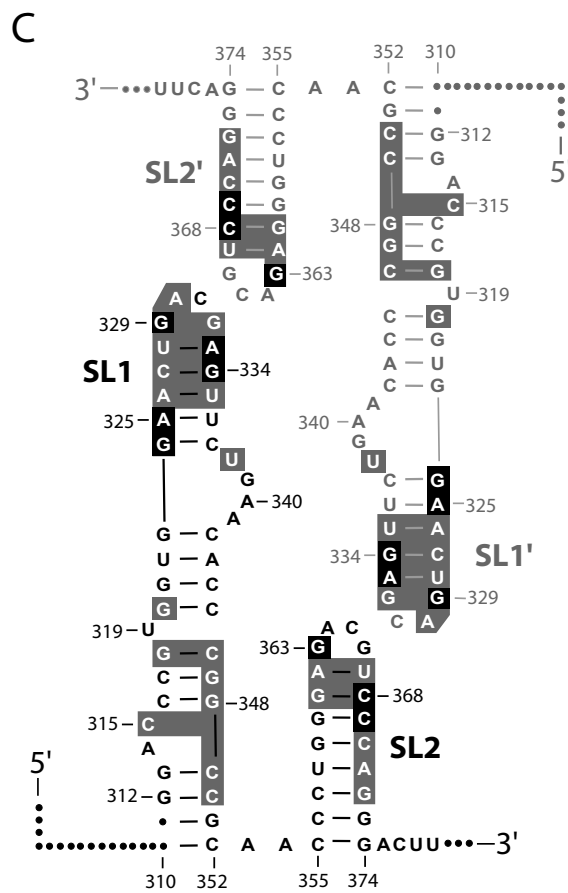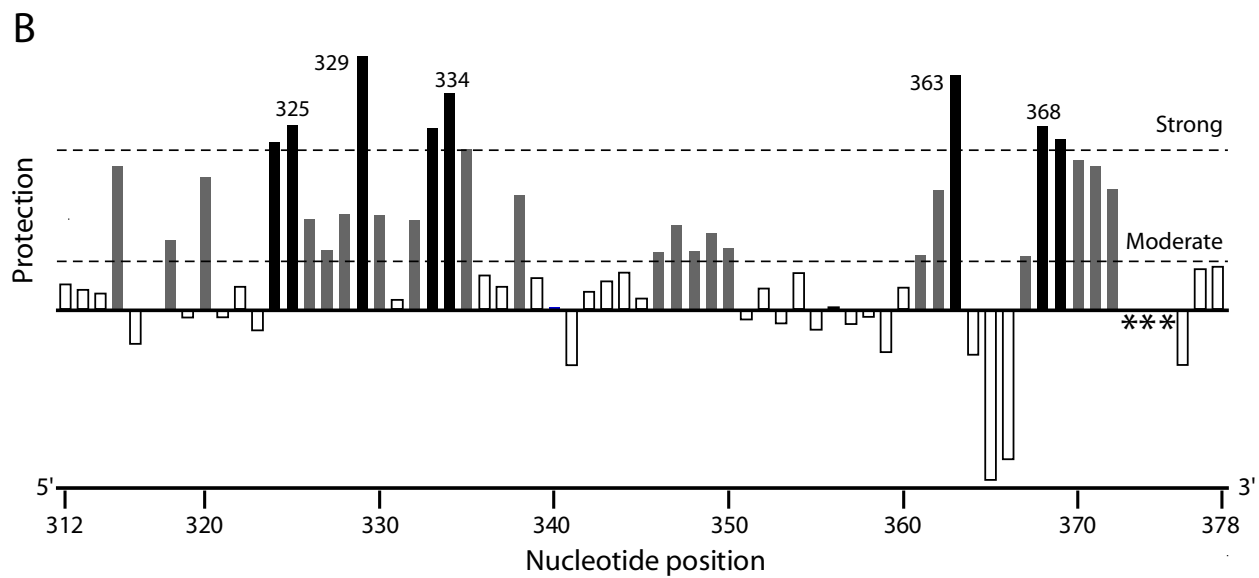

Supplement: pnas_0606156103_3.pdf [file pnas_0606156103_3.pdf]

A

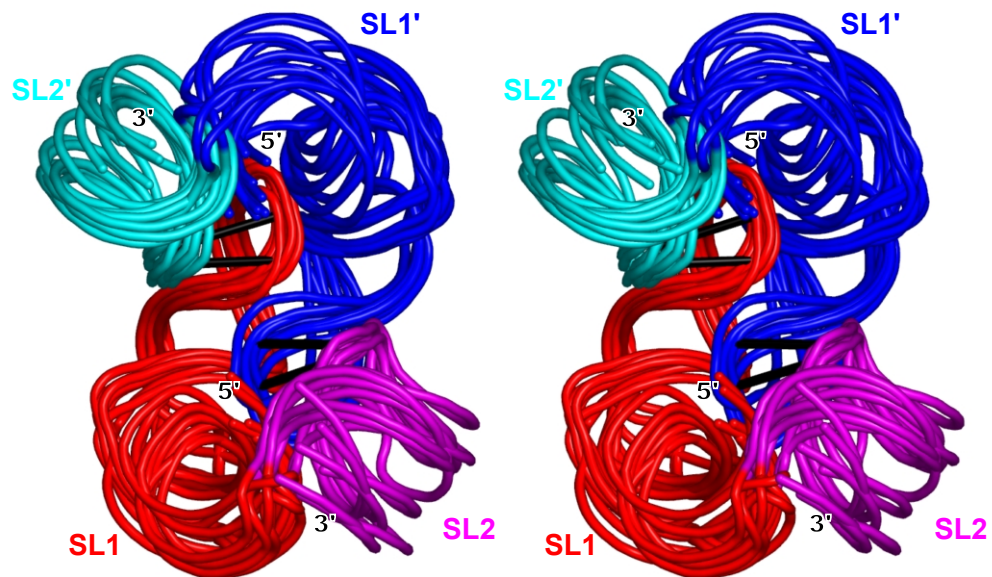

B

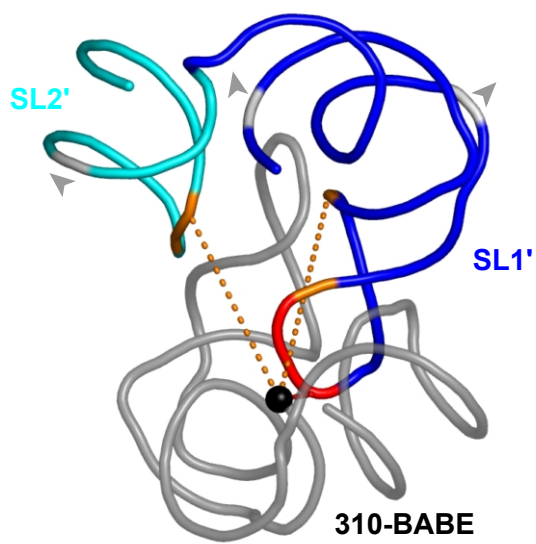

C

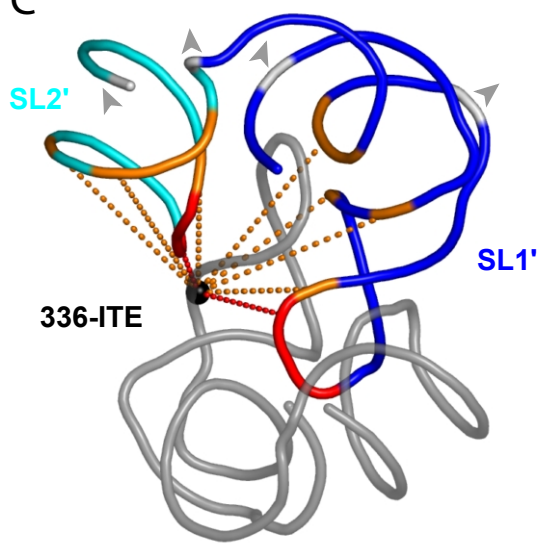

Supplement: pnas_0606156103_4.pdf [file pnas_0606156103_4.pdf]
